# Supplementary material for: Antibiofilm Activities of Cinnamaldehyde Analogs against Uropathogenic Escherichia coli and Staphylococcus aureus
Source: MDPI journal article supplement (doi:10.3390/ijms23137225), 2022-06-29
Supplement: s1 [file s1]

# Antibiofilm Activities of Cinnamaldehyde Analogs against Uropathogenic *Escherichia coli* and *Staphylococcus aureus*

Yeseul Kim <sup>1,†</sup>, Sanghun Kim <sup>1,†</sup>, Kiu-Hyung Cho <sup>2</sup>, Jin-Hyung Lee <sup>1,\*</sup> and Jintae Lee <sup>1,\*</sup>

<sup>1</sup> School of Chemical Engineering, Yeungnam University, Gyeongsan 38541, Korea; yeseul@ynu.ac.kr (Y.K.); minimo017@ynu.ac.kr (S.K.)

<sup>2</sup> Gyeongbuk Institute for Bioindustry, Andong 36618, Korea; khcho68@gmail.com

\* Correspondence: jinhlee@ynu.ac.kr (J.-H.L.); jtleee@ynu.ac.kr (J.L.); Tel.: +82-53-810-3812 (J.-H.L.); +82-53-810-2533 (J.L.)

† These authors contributed equally to this work.

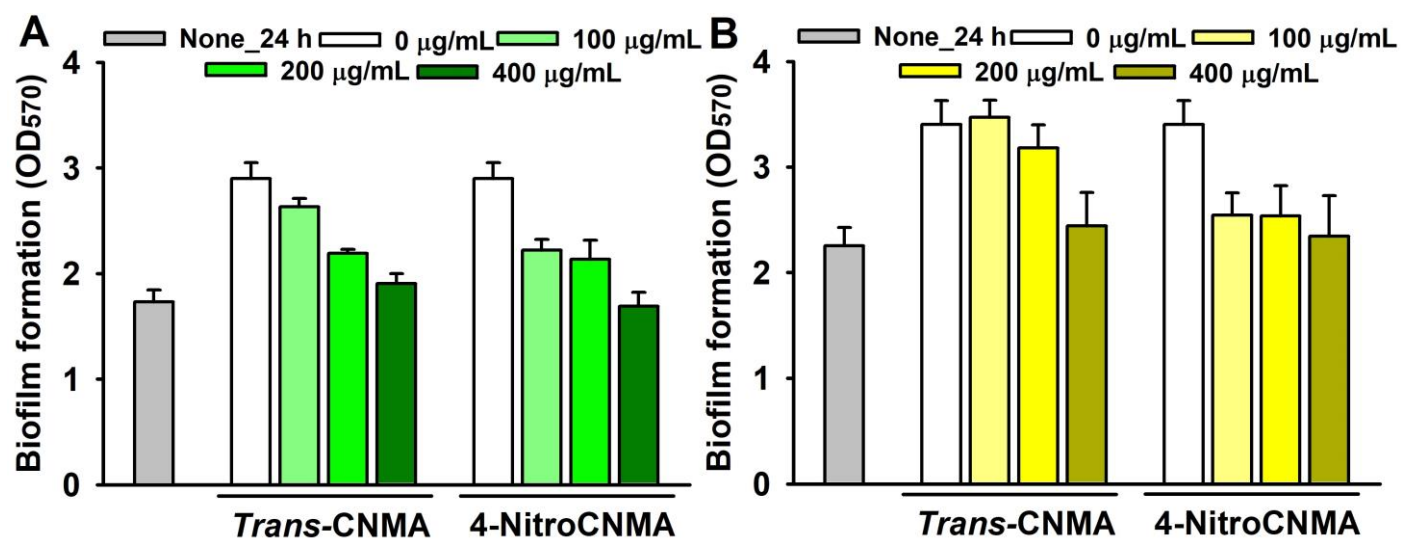

**Supplementary Figure S1.** Effects of *trans*-CNMA and 4-nitroCNMA on biofilm dispersal. Preformed biofilms of UPEC grown in NB medium (**A**) and of *S. aureus* grown in LB medium (**B**) for 24 h (grey bar) were treated with *trans*-CNMA or 4-nitroCNMA for 24 h. Biofilm formation was measured by crystal violet staining.

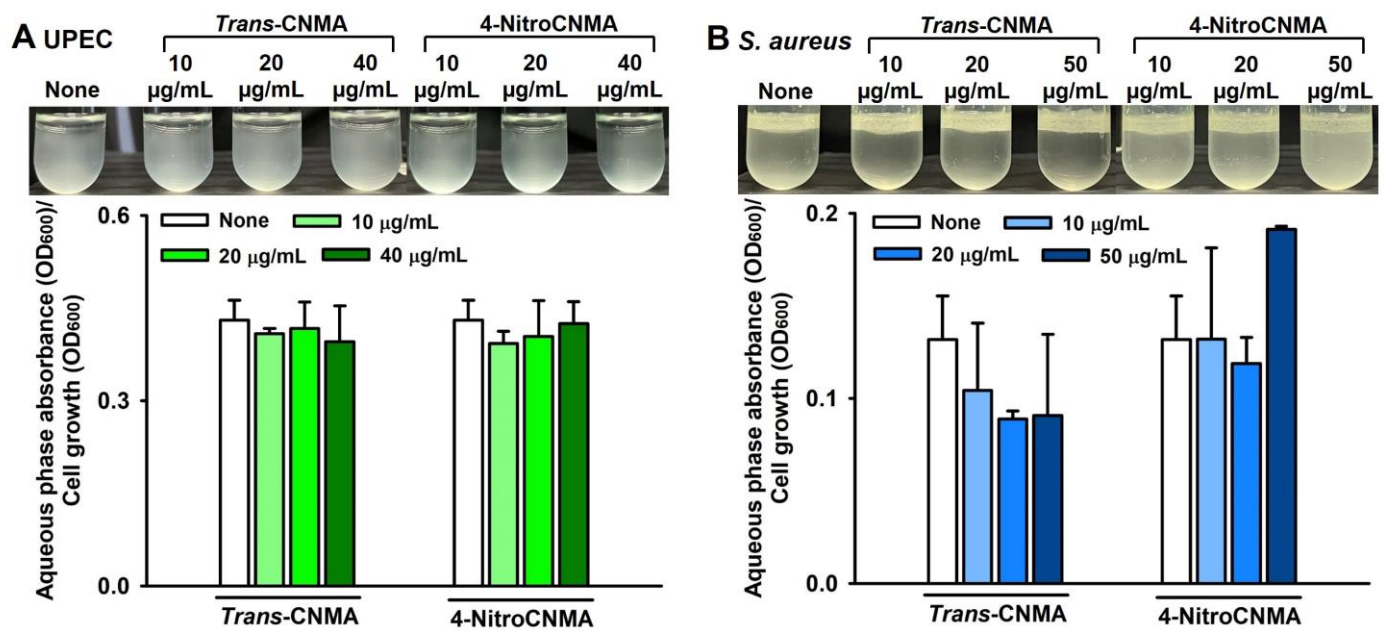

**Supplementary Figure S2.** Effects of *trans*-CNMA and 4-nitroCNMA on the hydrophobicity of UPEC (**A**) and *S. aureus* (**B**). Cell surface hydrophobicity of UPEC and *S. aureus* after treatment with or without *trans*-CNMA or 4-nitroCNMA at 10, 20 or 40  $\mu\text{g/mL}$  (*S. aureus* 10, 20 or 50  $\mu\text{g/mL}$ ).

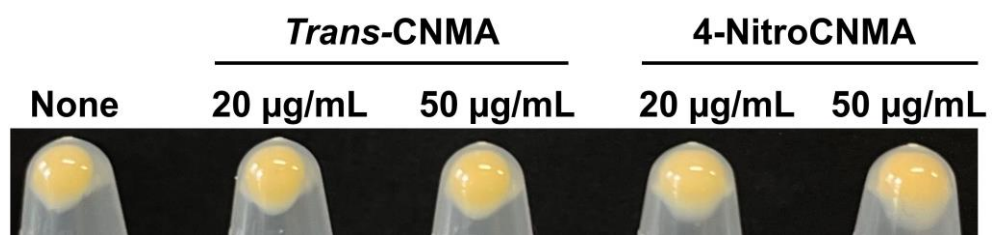

**Supplementary Figure S3.** Effects of *trans*-CNMA and 4-nitroCNMA on the production of staphyloxanthin in *S. aureus*.
